# Supplementary material for: Application of plasma metabolome for monitoring the effect of rivaroxaban in patients with nonvalvular atrial fibrillation
Source: PeerJ. 2022 Aug 9;10:e13853. doi: 10.7717/peerj.13853 (PMC9373988; doi:10.7717/peerj.13853)
Supplement: Table S1 [file peerj-10-13853-s001.xlsx]

## Sheet: Discovery group
Compound	1_1	1_2	2_1_1	2_1_2	2_3_1	2_3_2	2_4_1	2_4_2	2_6_1	2_6_2	2_7_1	2_7_2	2_8_1	2_8_2	2_9_1	2_9_2	2-13-1	2-13-2	2-17-1	2-17-2	2-20-1	2-20-2	2-24-1	2-24-2	2-30-1	2-30-2	2-33-1	2-33-2	2-34-1	2-34-2	2-36-1	2-36-2	2-37-1	2-37-2	2-38-1	2-38-2	2-42-1	2-42-2	2-44-1	2-44-2	2-46-1	2-46-2	2-47-1	2-47-2	2-48-1	2-48-2	2-53-1	2-53-2	2-54-1
label	NVAF	3h after intake	NVAF	3h after intake	NVAF	3h after intake	NVAF	3h after intake	NVAF	3h after intake	NVAF	3h after intake	NVAF	3h after intake	NVAF	3h after intake	NVAF	3h after intake	NVAF	3h after intake	NVAF	3h after intake	NVAF	3h after intake	NVAF	3h after intake	NVAF	3h after intake	NVAF	3h after intake	NVAF	3h after intake	NVAF	3h after intake	NVAF	3h after intake	NVAF	3h after intake	NVAF	3h after intake	NVAF	3h after intake	NVAF	3h after intake	NVAF	3h after intake	NVAF	3h after intake	NVAF
PE(18:4(6Z,9Z,12Z,15Z)/20:5(5Z,8Z,11Z,14Z,17Z))	1044.68	1651.91	306.155	3653.17	1246.02	4284.01	882.046	6550.51	534.972	6165.58	854.526	6458.43	653.497	8539.29	1239.37	6762.35	1195.43	5504.78	698.586	5754.47	901.741	5598.07	802.82	24358.8	616.706	7769.16	1575.53	9097.57	951.357	14854.3	1629.17	12607	988.727	17171.8	1343.26	10719.5	1439.57	6078.17	2049.87	6796.75	1223.38	4486.15	1978.49	5965.79	1728.37	7652.63	639.059	9154.07	1194.81
17a-Ethynylestradiol	7365.72	2259.44	8491.89	14348.6	3538.13	5215.09	1328.34	7680.59	4160.55	7454.59	9681.24	10292.6	11568.7	14919.1	4143.68	11938.4	3988.84	11276.4	4643.01	32582	17822.7	24073.6	11023.2	9675.09	3714.45	2911.64	15705.8	6144.65	10299.4	6407.65	7689.86	3769.32	8264.02	6090.56	7438.6	33072.9	5404.25	3861.94	1877.82	2061.66	2248.96	2094.87	9718.06	6793.84	4522.87	6354.61	7245.49	10159	4903.11
Prostaglandin PGE2 1-glyceryl ester	838.361	56.2279	2053.39	4938.96	1215.31	2111.77	233.355	1262.13	1354.73	3640.06	4898.71	7854.18	4796.79	10573.1	1565.51	4210.79	1447.72	5667.43	1515.52	13208.4	5196.01	16077	2356.31	3396.85	2547.25	1823.53	8063.98	2486.64	3130.93	2758.52	1417.16	862.611	2542.02	2691.59	2120.52	7511.47	3129.17	2176.45	1362.82	1883.4	1575.21	924.958	3892.01	3227.85	3037.62	1804.53	2839.49	3347.46	2515.47
Arginyl-Gamma-glutamate	1358.04	557.367	1674.78	2396.32	530.284	800.848	455.412	1112.69	1016.1	1254.87	1447.83	1827.14	1474.08	2550.7	719.516	1263.37	826.823	2192.13	817.775	5086.79	2073.75	4662.25	1584.99	1934.4	848.814	823.926	1937.12	752.356	1331.79	863.505	931.548	456.688	1174.01	832.415	1027.98	4648.06	1103.36	963.261	605.838	618.682	558.459	454.544	2042.65	1429.47	1443.57	1049.07	1330.38	1358.8	1111.05
Tryptophyl-Glutamate	186.663	348.459	80.1866	324.251	138.318	136.52	272.234	398.327	218.316	178.94	54.2053	152.265	207.699	138.728	125.353	81.6778	163.065	140.666	74.4083	181.678	76.3214	73.564	171.478	247.32	175.303	144.891	170.433	167.298	137.939	148.367	160.239	79.8469	201.933	88.1084	269.585	297.429	267.855	292.248	294.183	153.877	209.414	243.931	389.941	360.055	165.355	95.7864	1064.23	850.433	788.891
3-Deoxy-D-glycero-D-galacto-2-nonulosonic acid	461.224	1346.07	1062.99	1280.77	3405.38	1000.82	1421.09	500.094	1000.86	244.517	1269.67	1164.99	1128.04	690.504	2480.03	679.108	875.988	773.99	1049.22	600.383	658.39	669.672	2394.69	1289.06	1148.55	1135.74	2311.99	766.589	1844.84	1954.52	2485.2	1401.5	636.12	899.153	2167.9	1107.4	2345.38	2211.06	1869.73	1105.02	690.003	1614.48	1616.28	1417.85	2078.47	1228.22	1018.49	1917.02	587.218
Jurubine	918.118	53.0549	1487.98	1294.71	337.313	542.976	22.1878	307.588	453.005	663.069	1107.23	1796.35	1425.38	2424.37	294.539	676.409	357.801	1529.82	465.079	5878.61	1089.12	3801.32	1296.98	1987.49	447.611	224.566	2335.84	717.907	676.195	417.428	346.386	249.291	504.178	495.043	382.428	2597.99	781.579	509.768	238.084	331.911	268.435	132.368	1457.58	1006.4	1270.88	571.62	876.521	1084.78	601.933
9,10,13-TriHOME	591.245	805.161	400.403	269.014	591.535	642.702	275.504	376.154	533.394	179.281	256.013	233.959	103.294	454.517	467.572	386.958	468.302	466.859	434.028	334.147	353.208	420.927	485.737	463.81	581.146	950.919	339.403	211.533	487.148	488.309	539.469	317.287	826.839	597.452	530.577	840.783	425.515	462.25	432.711	413.892	484.847	275.562	312.572	106.224	283.675	294.024	503.123	580.766	505.025
Erythronic acid	160.214	745.489	499.711	618.281	1897.33	309.957	794.874	105.233	580.791	63.7072	729.207	627.754	540.746	156.662	1502.53	154.587	331.561	149.815	511.049	131.241	189.48	138.946	1216.42	571.727	534.574	416.257	1249.14	314.91	953.329	923.985	1284.38	675.419	287.476	440.085	1139.84	525.805	1432.5	1062.27	1101.98	558.708	362.27	1047.36	917.01	781.999	1109.54	527.382	617.523	1053.81	307.653
Indoleacetaldehyde	25.1772	90.3875	41.628	44.5798	90.5487	35.002	51.8044	46.6025	185.99	93.1696	40.8313	52.6275	19.9972	29.8621	78.722	12.6201	17.8316	31.2988	20.2577	33.4557	27.7445	56.4651	76.0506	45.2573	49.9768	30.1573	45.9661	76.5408	34.9391	43.8523	86.8699	102.126	54.312	46.1943	84.0396	96.7055	49.5206	78.5827	69.5448	36.9052	41.0538	46.1373	41.4199	16.6813	58.4899	36.4254	42.0117	73.3214	40.8576
Methionyl-Hydroxyproline	307.601	51.5084	337.411	654.131	147.953	295.997	50.3567	243.247	125.66	285.906	592.741	801.084	1034.76	1154.98	245.938	529.729	159.994	338.672	181.9	1376.58	685.737	1293.46	383.743	339.555	251.439	299.646	714.113	200.827	328.579	262.834	146.725	89.1626	304.24	258.054	234.14	1065.25	262.376	260.211	78.7755	61.0298	30.3081	12.4609	318.555	249.373	163.154	86.7734	283.997	255.447	208.817
Lactapiperanol C	128.463	120.049	229.494	453.047	204.575	466.293	367.026	488.974	307.263	549.568	274.861	234.635	281.174	169.342	323.88	418.46	317.572	364.344	250.037	281.229	280.197	154.311	793.988	160.234	434.4	165.324	693.231	188.743	756.853	142.685	734.465	160.601	933.055	135.538	708.854	152.749	860.27	153.034	586.975	142.126	654.2	149.668	760.612	171.341	461.341	162.656	791.573	143.331	735.97
Tuftsin	342.047	58.551	790.181	992.928	430.557	464.287	376.968	520.219	488.175	990.044	1282.07	1952.08	1535.23	2552.25	693.891	1258.21	680.093	1670.56	469.984	3351.15	1470.89	3978.1	834.247	940.104	701.117	595.592	1770.87	569.76	971.606	726.338	399.205	215.164	829.853	707.598	689.325	2006.33	780.281	601.215	668.218	668.966	487.399	317.338	1242	913.912	1206.81	909.862	974.151	1319.54	724.401
Cortisol	1873.62	2052.96	1867.43	2686.39	784.784	1951.62	3119.66	3150.39	3238.72	1520.38	1994.6	2105.29	456.185	441.272	2221.46	1231.74	2774.78	1833.76	4142.81	1429.78	2804.77	2199.42	1796	2663.56	1337.41	1920.04	2304.2	1275.91	3007.04	1082.39	2260.12	1127.29	1679.14	1198.28	2468.33	1928.39	2568.89	1670.62	2194.7	2144.26	1222.22	510.154	2030.14	777.862	1639.61	877.251	1905.08	2180.07	1638
Threoninyl-Gamma-glutamate	1.8073	6.25149	189.624	196.953	1681.96	2507.34	103.892	237.337	183.399	162.821	837.23	1445.59	1356.98	1604.63	1754.69	2258.55	314.125	322.068	64.7558	377.76	701.028	628.651	343.232	134.54	1683.22	1555.96	642.733	426.862	150.049	239.276	226.141	514.79	109.159	71.5426	150.021	198.688	256.011	166.482	128.321	238.402	114.493	89.4214	311.683	19.1777	262.921	109.43	608.524	9.94319	14.1331
3,4,5-trihydroxy-6-{[2-hydroxy-3-(4-hydroxy-3-methoxyphenyl)propanoyl]oxy}oxane-2-carboxylic acid	1963.7	1809.85	1781.15	3278.1	1733.24	3519.95	1320.9	4251.1	1948.13	4384.04	1494.7	3186.38	1260.87	3281.09	1479.94	4029.63	1404.37	3875.92	1471.2	3963.19	1272.57	3735.81	4008.03	3727.62	3657.3	4233.95	3462.49	4592.26	3876.93	4102.23	4091.51	3742.59	4398.03	3734.62	4374.42	4302.69	4653.38	4517.82	1506.73	3863.6	1459.12	4413.36	1547.92	3796.73	1197.12	4520.47	1649.38	4175.03	1592.22
5(S),14(R)-Lipoxin B4	180.103	205.684	97.3659	45.2606	189.184	157.552	81.6306	102.345	174.795	77.5656	22.664	26.8414	0.00570346	43.3518	89.8444	115.157	111.6	154.887	102.861	111.242	77.2855	143.169	114.284	127.357	116.108	212.711	110.709	69.931	145.459	160.704	151.3	122.427	220.248	174.544	158.928	277.459	116.91	158.38	125.776	140.938	113.939	88.1267	101.14	6.67142	70.7509	69.7269	160.582	173.196	139.685
7-Methylguanosine	60.7231	140.536	136.413	78.6443	187.344	140.977	111.728	120.986	116.637	56.9321	92.1889	77.7298	112.308	122.39	70.69	73.643	58.6989	77.4503	86.0661	94.1564	110.185	161.887	104.75	92.5363	109.335	136.185	113.494	77.6575	184.036	126.215	99.7999	45.6422	178.279	143.608	61.9665	55.6775	106.846	75.5572	116.786	64.8955	81.7018	79.8217	202.577	111.903	89.365	76.1369	101.202	86.9138	118.065
Prenyl glucoside	1850.2	1467.41	934.666	2168.18	1157.31	2494.79	1391.59	3038.95	1362.77	3325.21	1046.26	2176.18	964.629	2262.16	937.846	2763.21	976.588	2766.18	1003.59	2866.53	891.233	2607.17	2939.9	2766.73	2394.11	3049.96	2578.4	3355.55	2831.17	2949.78	2958.4	3282.97	2889.31	2753.6	2932.7	2986.78	3104.41	3180.16	1139.35	2525.73	1124.12	3200.59	1085.27	2801.83	900.186	3104.58	1170.81	2966.03	1167.67
(1R,2R,4R,8R)-p-Menthane-2,8,9-triol	102.413	76.9439	158.247	67.9058	136.843	58.1763	105.005	66.3753	150.445	69.6	155.152	63.868	95.6505	43.3503	121.112	55.2713	149.034	60.5655	174.744	100.569	135.508	71.0506	126.892	63.4721	287.27	108.427	109.374	126.491	118.03	96.6322	111.073	143.693	109.79	126.4	101.828	79.2173	95.7032	85.8276	130.519	190.148	152.066	120.621	89.0538	101.137	337.917	81.1159	90.2629	128.854	146.909
Avocadene	168.514	154.859	913.598	249.873	1113.98	304.355	485.732	220.091	653.454	433.542	423.177	262.685	633.276	362.736	1195.39	402.268	1120.07	364.599	1067.64	370.5	917.959	391.016	1550.91	167.668	768.74	282.949	1003.83	1160.31	1190.57	814.729	952.364	418.973	946.137	449.822	977.051	431.132	519.711	281.929	494.235	784.7	1496.58	486.241	686.188	587.516	1037.45	651.678	699.355	433.666	1284.2
1-O-Caffeoyl-(b-D-glucose 6-O-sulfate)	4971.89	5435.61	5441.01	9101.3	5207.39	10772	4430.47	12481.3	5754.58	12637	4602.5	9198.05	3998.4	9037.8	4570.05	10906	4275.12	10566.4	4563.08	11052.4	4153.12	10635	12153.4	10841	10349.7	12101.3	10993	12595.8	11592.2	11802.7	12074.6	12507.6	13117.7	10797.2	13103.6	12192.9	13636.6	12745.3	4664.23	10945.8	4580.8	12970.9	4554.18	11667	3844.83	12814.3	5158.59	12269.7	4779.15
(6beta,7alpha,12beta,13beta)-7-Hydroxy-11,16-dioxo-8,14-apianadien-22,6-olide	162.103	362.414	208.352	245.325	93.6515	218.291	335.238	442.741	231.005	202.14		1.61506	7.86244	31.0162	400.639	428.746	233.465	236.038	245.346	272.39	129.328	176.165	333.419	377.965	222.146	402.412	192.831	130.1	397.255	262.531	190.975	155.017	333.961	192.562	590.559	530.614	181.188	281.568	296.13	355.568	318.301	118.003	688.308	350.283	217.553	168.636	185.339	262.354	231.838
LysoPA(0:0/18:1(9Z))	476.523	233.653	797.586	981.009	363.842	404.426	277.047	380.296	375.045	688.764	984.538	1612.24	1072.39	1796.31	366.321	918.081	406.326	1341.28	408.704	2880.38	1064.41	3489.11	791.776	884.344	428.339	401.921	1888.95	518.25	850.891	527.173	361.47	242.91	660.163	454.07	562.899	1460.23	732.358	445.259	309.804	309.807	331.544	213.206	1059.53	711.92	724.004	485.041	671.945	829.559	579.9
2,3,23-Triacetylsericic acid	653.228	1096.58	132.779	4703.29	1279.95	5000.16	264.512	7860.32	300.148	5509.37	868.945	5848.09	558.379	6501.31	1153.49	7488.06	680.365	5267.65	237.236	6349.93	0.492639	4746.76	629.632	16939.5	663.792	7407.1	1439.35	8012.64	1579.09	16151.6	2642.14	13783.3	588.695	15460.4	1483.75	10732.4	988.196	5993.03	1331.46	6001.9	1856.65	4618.61	1872.66	5891.16	761.855	8208.33	856.108	9573.21	1303.44
Nummularine B	991.165	1459.3	153.21	4533.28	1198.42	4135.8	294.754	6947.66	316.506	6349.59	987.096	5549.14	695.747	6767.17	1333.56	6990.01	652.912	5288.69	309.5	5368.37		4866.62	651.03	16558.5	563.493	7493.13	1593.53	6829.17	1558.29	15342.7	2366.03	12552.4	784.623	14631.2	1618.21	10032.6	1054.58	6294.2	1206.11	5125.4	1523.34	5035.21	1712.49	5610.33	676.873	7455.85	830.913	10117.4	1581.02
N-Acetylleucine	459.073	250.436	231.326	225.001	71.929	144.271	383.89	643.762	175.775	61.5495	160.502	115.898	129.858	64.7916	283.055	249.274	189.497	137.175	132.233	69.1033	95.9341	80.8214	214.229	95.9176	89.56	121.661	182.24	167.527	174.066	101.079	142.569	55.1106	196.121	69.4168	127.429	114.41	240.597	159.789	231.492	138.098	233.677	207.886	148.328	144.153	96.4692	170.838	204.427	120.693	202.007
Adenosine	153.636	70.9347	20.5283	29.0847	102.739	192.585	18.5236	40.1247	27.8807	44.5329	13.7374	58.5771	18.8645	22.3385	38.1128	36.0267	29.1067	35.7483	33.2875	34.2861	15.2764	39.0295	39.227	53.0356	42.6169	43.3713	40.0052	58.7865	43.5668	75.9769	29.6595	43.8602	96.5047	111.953	94.3909	141.967	44.1851	113.749	83.4677	143.196	80.0188	175.661	75.0446	59.6946	83.721	88.4043	68.632	105.843	56.2731
[truncated: 151 more columns]

## Sheet: Validation group
Compound	2_1	2_2	2_2_1	2_2_2	2_5_1	2_5_2	2_10_1	2_10_2	2_11_1	2_11_2	2-14-1	2-14-2	2-15-1	2-15-2	2-18-1	2-18-2	2-19-1	2-19-2	2-21-1	2-21-2	2-22-1	2-22-2	2-25-1	2-25-2	2-27-1	2-27-2	2-28-1	2-28-2	2-29-1	2-29-2	2-31-1	2-31-2	2-32-1	2-32-2	2-39-1	2-39-2	2-40-1	2-40-2	2-41-1	2-41-2	2-43-1	2-43-2	2-45-1	2-45-2	2-49-1	2-49-2	2-50-1	2-50-2	2-51-1
label	NVAF	3h after intake	NVAF	3h after intake	NVAF	3h after intake	NVAF	3h after intake	NVAF	3h after intake	NVAF	3h after intake	NVAF	3h after intake	NVAF	3h after intake	NVAF	3h after intake	NVAF	3h after intake	NVAF	3h after intake	NVAF	3h after intake	NVAF	3h after intake	NVAF	3h after intake	NVAF	3h after intake	NVAF	3h after intake	NVAF	3h after intake	NVAF	3h after intake	NVAF	3h after intake	NVAF	3h after intake	NVAF	3h after intake	NVAF	3h after intake	NVAF	3h after intake	NVAF	3h after intake	NVAF
PE(18:4(6Z,9Z,12Z,15Z)/20:5(5Z,8Z,11Z,14Z,17Z))	4323	4071.84	679.945	3694.61	717.188	6849.22	934.484	6082.89	1071.66	13868.1	587.953	6297.42	1038.98	6939.97	639.879	8754.33	1079.79	8021.2	3020.82	8631.14	512.885	4576.35	286.643	6835.59	722.976	8756.01	475.938	7173.24	796.134	9648.2	1055.27	20560.6	1687.91	18808.1	2115.68	12184.8	1078.69	14743.5	1278.24	5119.51	962.458	5294.78	507.783	5522.03	4191.25	6132.06	1554.95	5149.02	1614.16
17a-Ethynylestradiol	2524.27	2978.68	657.638	8613.93	486.174	4911.96	4383.72	21112.2	14353.3	27461.2	4506.69	12650.1	7336.23	7870.46	5520.01	14560.6	15685.6	36365.1	21660.9	7849.68	9363.09	8420.35	16131.7	6799.36	23169.6	26896.4	16527.9	23265.2	25024	17782.3	7852.91	7335.71	7640.9	8856.8	6513.42	6880.67	6017.5	8024.89	2399.75	2168.27	14577.9	6370.03	1740.01	6693.58	4010.17	5454.68	30.31	168.65	5717.08
Prostaglandin PGE2 1-glyceryl ester	92.3115	271.179	119.106	4301.21	31.0924	1584.77	1558.67	4853.67	3206.02	13273.6	1621.18	5301.91	2911.28	3925.26	1422.79	5714.97	5907.41	13915.7	8651.62	2884.73	3070.41	3451.95	5921.79	2712.57	5205.87	6456.76	3421.94	5464.79	4783.27	3398.47	2042.29	2465.11	2163.64	2781.73	1978.35	1711.09	1925	2659.42	1729.18	1276.23	4466.34	2194.63	974.858	2636.59	2828.36	2834.4	11.2948	1.24631	2476.27
Arginyl-Gamma-glutamate	425.358	582.989	169.186	1951	174.433	804.416	755.337	2487.03	1409.73	3361.09	1007.41	2032.81	1310.26	1691.23	839.235	2022.9	2090.46	4478.53	3280.45	1320.18	1367.55	1380.51	2646.03	1464.46	4041.43	5134.26	2517.4	4172.54	4551.63	2837.9	838.148	1299.81	904.383	1019.23	942.181	791.678	788.145	1045.94	636.397	409.642	1724.93	1193.49	420.444	1166.28	1000.22	1189.16	21.7672		751.361
Tryptophyl-Glutamate	366.98	192.684	201.139	278.796	205.228	1345.28	218.94	199.044	136.857	152.257	90.9195	133.772	265.912	143.592	150.182	285.04	86.4852	110.196	220.846	275.645	133.444	79.822	222.425	117.211	74.3128	82.104	167.047	170.17	168.788	254.547	112.757	66.4965	146.998	186.16	91.9957	51.2251	191.334	205.417	97.8167	180.429	139.924	111.055	232.646	83.3446	159.608	72.0565	459.317	511.103	272.482
3-Deoxy-D-glycero-D-galacto-2-nonulosonic acid	1731.93	735.627	1113.23	588.276	773.323	2009.56	1755.42	1264.01	1710.04	577.689	2327.24	929.579	1655.66	1093.63	1146.3	414.8	3020.17	2804.36	753.079	841.72	730.909	675.979	888.413	364.35	1707.38	775.066	207.425	845.579	1151.35	1351.02	1266.47	990.183	1831.18	760.104	971.267	1798.87	1131.53	714.289	781.85	1263.34	2597.49	1390.15	2489.34	2422.99	1585.42	845.879	674.893	412.298	447.873
Jurubine	12.7726	1.03256	19.147	1396.17	10.3749	181.56	287.341	1299.98	1055.4	2995.63	557.882	1168.78	1014.57	1028.28	398.968	1556.89	1458.72	5067.89	3840	1387.99	1261.09	1417.14	2435.44	967.623	2473.34	3518.12	1832.88	3276.78	2705.4	1671.58	323.788	446.579	277.137	348.98	365.274	391.514	367.937	453.752	573.046	316.978	1874.5	698.098	162.523	744.482	454.001	755.994	45.3214	8.81161	291.362
9,10,13-TriHOME	452.787	593.503	768.104	432.51	524.241	349.35	585.425	328.735	500.919	497.736	466.085	496.573	536.83	348.441	402.047	492.652	395.035	681.601	332.082	212.837	229.407	161.939	310.678	307.439	314.908	332.551	261.835	398.312	284.875	332.647	643.245	476.381	648.301	647.481	283.811	518.665	500.694	259.82	314.903	294.803	377.82	335.921	552.313	338.693	271.959	260.196	482.711	470.886	520.759
Erythronic acid	1204.37	337.522	430.555	178.783	345.559	1489.81	958.327	644.865	1113.21	179.561	1429.63	398.095	1176.68	342.432	694.234	85.7225	1944.79	1667.74	443.555	340.144	269.364	255.954	393.432	87.9322	875.796	322.713	60.9033	389.442	594.429	620.443	590.8	419.264	937.633	228.182	481.685	968.094	639.965	268.774	427.851	634.483	1545.08	641.889	1407.73	1348.86	859.659	303.591	213.333	58.3238	163.816
Indoleacetaldehyde	84.1578	52.054	25.1375	12.7866	41.3571	276.975	224.495	80.3261	137.136	45.9913	61.5483	84.8988	35.5111	27.4664	83.9623	170.262	39.8277	66.248	43.5813	46.68	163.984	80.6132	42.4705	18.2791	53.8344	28.6955	31.8186	51.0821	37.5094	33.7905	37.0814	57.819	32.553	24.8377	163.849	100.38	6.82231	6.71193	56.0516	53.885	154.918	465.497	208.026	218.882	49.1989	26.4816	28.768	28.5749	22.9735
Methionyl-Hydroxyproline	48.8148	50.0039	18.4376	384.445	45.8101	396.754	210.227	611.442	512.777	1143.9	145.794	357.516	254.319	242.312	150.184	443.944	682.218	1803.57	766.148	400.753	467.921	405.551	545.304	331.947	686.633	856.649	488.643	802.634	642.091	539.72	250.526	283.898	207.855	299.928	264.398	299.78	416.069	585.793	110.309	110.661	443.121	217.952	73.4746	181.86	178.78	217.192	96.8705	17.593	300.287
Lactapiperanol C	101.297	43.2831	307.758	375.466	270.602	375.868	317.099	375.054	367.218	303.012	385.302	481.994	311.415	283.863	418.948	428.233	342.406	342.355	587.12	155.146	687.003	200.76	671.171	143.409	829.021	195.7	765.966	112.933	678.83	202.153	622.894	63.7028	762.2	86.2209	787.919	120.56	475.216	94.8084	488.321	246.823	739.999	166.792	738.519	116.683	627.725	100.064	853.961	194.431	684.687
Tuftsin	160.392	107.538	104.491	1118.98	63.7483	399.945	402.41	1093.41	984.035	3155.65	530.548	1124.17	1202.38	1249.96	540.765	1372.31	1433.55	3245.58	2070.41	757.954	945.115	910.045	1446.67	670.731	1399.76	1781.89	963.043	1588.87	1465.66	930.94	685.168	645.069	559.361	688.901	815.929	475.852	790.513	934.014	482.669	422.394	1101.75	640.662	369.17	913.798	791.149	918.074	53.6976	51.3444	846.169
Cortisol	2417.44	1843.66	3486.01	1487.03	2435.02	2650.03	2206.21	1031.23	2158.47	1474.39	1866.62	1262.15	4109.08	1331.87	1931.36	1886.49	2007.18	2830.19	2946.17	1335.96	3186.93	1290.46	1632.86	975.025	1829.53	2579.81	1696.07	3275.63	1589.35	1060.36	3076.68	2114.82	3074.66	2072.72	2734.99	1497.07	1151.58	597.157	1496.36	1381.17	1491.41	856.918	2174.99	2343.45	1196.16	1165.2	1741.54	2652.65	2388.44
Threoninyl-Gamma-glutamate	3.99148	1.62171	261.22	185.307	245.45	300.978	2854.21	1996.37	95.7724	2154.81	179.501	361.864	200.061	346.023	72.546	252.917	1035.04	420.686	243.073	331.141	275.41	136.65	177.285	42.1595	275.369	207.37	161.694	24.8936	92.7284	240.955	17.2243	244.616	139.935	132.781	2872.71	205.44	778.416	1109.74	202.423	153.75	262.117	44.9242	171.532	41.64	394.958	2.536		69.3348	806.981
3,4,5-trihydroxy-6-{[2-hydroxy-3-(4-hydroxy-3-methoxyphenyl)propanoyl]oxy}oxane-2-carboxylic acid	2113.48	1545.61	1839.57	3294.92	1761.53	3442.49	1451.04	4041.8	1371.55	4040.47	1481.81	4214.04	1235.72	3788.45	1499.2	4143.84	1325.23	4142.99	3158.77	3735.1	3759.76	4290.77	3960.19	4161.33	4398.15	4332.34	4453.97	4486.53	4378.29	4457.26	4358.6	3725.61	4594.88	3735.46	4247.51	3997.71	3501.12	3851.9	3591.21	4162.56	4194.59	4375.32	1615.04	3804.76	1511.52	3890.07	1664	4866.94	1643.52
5(S),14(R)-Lipoxin B4	115.512	159.772	195.048	80.9195	136.536	82.5468	110.745	86.9178	117.56	160.36	145.091	161.471	114.02	117.979	102.078	163.754	91.9528	254.284	86.0791	73.5574	70.9576	52.991	108.865	96.8056	79.9787	129.275	89.2771	134.4	78.9357	112.765	217.866	166.256	171.798	177.022	72.1295	168.521	79.1615	56.9128	94.8246	77.0668	110.574	100.942	134.819	79.8326	72.3898	66.161	133.089	137.671	179.08
7-Methylguanosine	79.4968	86.5266	199.87	113.495	194.419	73.1019	129.711	123.364	79.4811	142.05	93.4358	100.629	166.65	151.162	80.023	94.5271	46.272	101.753	88.4448	62.381	92.781	50.9939	96.3257	69.0055	102.341	115.848	106.082	85.0909	79.4672	74.0936	170.319	140.311	97.7602	76.4491	128.511	66.3532	137.738	119.009	96.334	67.2152	93.4363	75.6301	140.406	85.156	83.7196	57.9307	130.142	92.5458	127.89
Prenyl glucoside	2238.72	1326.88	1298.77	2321.64	1322.5	2391.53	1133.06	3046.44	974.122	2808.79	1065.92	3136.85	836.529	2778.6	1120.62	2969.29	1000.25	2964.25	2069.04	2973.87	2726.91	3131.07	2664.97	3151.89	2923.05	2972.65	2900.1	3110.02	2732.44	3108.56	3006.76	2893.91	3046.06	2904.31	2768.1	3011.1	2486.11	2836.13	2376.2	2918.14	2917.27	3202.89	1247.65	2763.72	1123.67	2665.99	1282.33	2892.45	1205.74
(1R,2R,4R,8R)-p-Menthane-2,8,9-triol	111.396	123.878	126.384	60.5893	182.114	63.6227	137.067	51.0833	117.493	55.7944	147.281	65.1977	146.942	83.3019	140.942	62.0976	141.582	72.9134	94.6893	55.7331	128.283	64.2514	128.611	74.4661	95.1876	108.876	105.161	98.4945	138.37	97.0168	84.6587	110.769	86.5622	94.3107	94.3483	82.4117	184.478	87.1575	191.327	210.112	104.019	121.544	123.573	146.964	118.714	121.013	112.9	190.1	80.3626
Avocadene	87.5454	101.826	864.601	429.072	2272.35	332.173	1254.88	277.967	549.781	510.097	1729.45	294.303	979.913	265.329	1213.26	272.232	1374.59	526.021	2446.09	345.648	2110.52	354.207	2009.59	259.128	893.559	1041.15	423.228	310.316	1705.43	539.151	320.219	285.162	1621.23	302.752	1116.17	392.032	409.366	237.281	946.846	426.668	563.57	649.51	673.664	490.545	1078.71	397.127	594.559	576.877	496.641
1-O-Caffeoyl-(b-D-glucose 6-O-sulfate)	5416.18	4294.1	5971.6	9649.69	5700.59	9715.88	4933.39	11330.3	4315.16	10878.8	4428.17	11515.6	4070.18	10241.2	4496.84	11597.3	4158.16	11974.7	9344.31	11333.6	11428	12593.4	11941.1	12598	12748.3	12619.8	12931.2	13146.3	12159.6	12420.4	13048.8	11729.8	13027	10979.5	12432.7	12160.9	10663.7	10824.3	10170.4	11637.6	11931.5	12634.3	5157.88	11234.8	4967.21	11028.2	5384.23	14132.7	5034.14
(6beta,7alpha,12beta,13beta)-7-Hydroxy-11,16-dioxo-8,14-apianadien-22,6-olide	349.713	281.306	369.397	176.654	365.34	396.482	194.32	161.412	164.733	141.565	185.876	233.716	275.14	226.575	363.02	477.603	320.88	626.926	124.913	116.023	163.196	93.4629	161.36	149.626	170.162	302.874	105.672	183.216	203.857	312.431	355.228	245.151	598.471	497.714	134.111	229.963	21.3099	82.5604	207.83	186.076	178.522	246.674	275.295	180.157	119.893	154.135	251.237	242.693	241.455
LysoPA(0:0/18:1(9Z))	56.2102	44.3103	108.228	866.352	188.917	353.413	337.509	1066.9	826.093	2716.91	404.326	1023.6	656.657	922.489	343.978	1229.6	1245	2863.16	1955.73	792.411	715.548	816.21	1377.75	523.074	1231.4	1505	787.248	1154.27	1237.87	901.365	571.769	476.938	443.875	533.532	624.11	486.778	391.047	694.859	410.692	348.708	1019.98	510.89	198.501	553.248	599.037	726.728	58.315	147.101	492.774
2,3,23-Triacetylsericic acid	3658.08	2628.87	200.379	4125	382.766	8362.35	1419.9	6750.81	1198.89	13619.5	387.261	7449.77	498.55	5922.22	244.04	8690.27	983.158	7926.5	1677.87	7298.68	728.913	5571.68	133.618	7310.45	334.98	9464.79	450.005	7887.75	546.45	8876.85	718.703	16058.5	1036.61	16221.7	1526.52	12976.7	920.28	13390.9	1002.76	5684.5	413.894	4790.53	444.667	4954.85	3904.2	5830.03	1460.41	5846.85	1209.8
Nummularine B	3279.99	3168.07	212.726	4120.95	300.588	7361.72	1205.21	6718.73	1222.58	11708.5	497.131	6824.07	422.001	6067.29	207.193	7561.52	897.076	8519.62	1842.99	8564.71	672.267	5253.91	180.989	6835.75	383.569	8774.84	467.724	7288.99	497.908	9197.67	826.986	13700.1	993.044	14679.3	1868.48	12763.8	1108.45	12624.1	1094.81	5431.78	622.956	4965.98	376.545	4458.62	4158.19	5286.42	1401.58	6114.99	1421.63
N-Acetylleucine	292.57	180.677	242.424	87.4014	236.707	252.279	193.832	107.517	189.502	91.0405	221.414	122.949	188.106	78.7802	238.386	119.634	172.821	147.069	125.216	74.9504	181.498	206.845	39.3867	100.927	160.69	109.357	180.788	89.3294	144.595	102.084	221.083	171.088	157.892	87.1951	169.947	160.384	132.497	114.697	31.1639	117.588	114.189	124.892	221.831	146.795	190.059	72.5405	235.06	150.281	222.899
Adenosine	181.331	97.2801	18.8117	57.0887	14.6048	67.5839	58.9508	43.2115	25.4281	25.5685	28.736	63.8038	25.2181	77.7833	41.0992	65.0507	25.9487	44.1304	45.8906	31.0091	126.947	140.494	53.3244	46.1683	56.7401	52.3346	65.9699	97.0754	114.232	122.812	56.0849	66.5387	56.7285	87.0468	106.117	153.886	60.6727	98.6528	65.6188	107.104	60.943	270.706	52.8232	107.374	56.2954	113.209	46.1524	56.0091	29.3966
[truncated: 151 more columns]
